# Supplementary material for: Molecular Basis and Ecological Relevance of Caulobacter Cell Filamentation in Freshwater Habitats
Source: PubMed Central journal article supplement (PMC6703425; doi:10.1128/mbio.01557-19), 2019-08-20

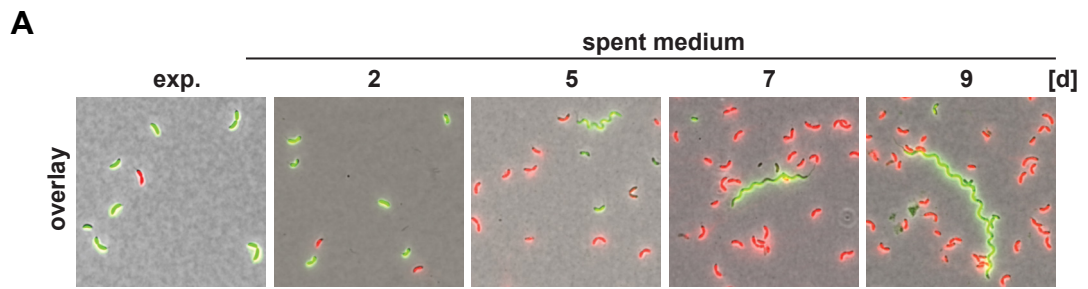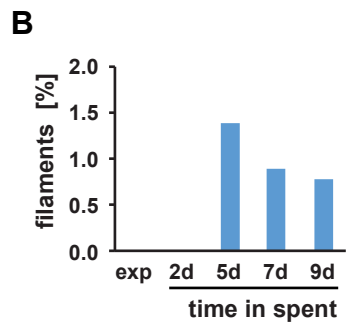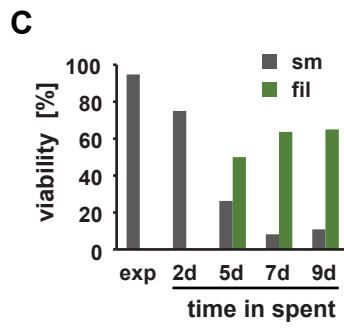

Supplement: mBio.01557-19-sf002.pdf [file mBio.01557-19-sf002.pdf]
